# Supplementary material for: Studying the characteristics of nanobody CDR regions based on sequence analysis in combination with 3D structures
Source: PubMed Central journal article supplement (PMC9684374; doi:10.1186/s43141-022-00439-9), 2022-11-21

### Supplement Figure 1

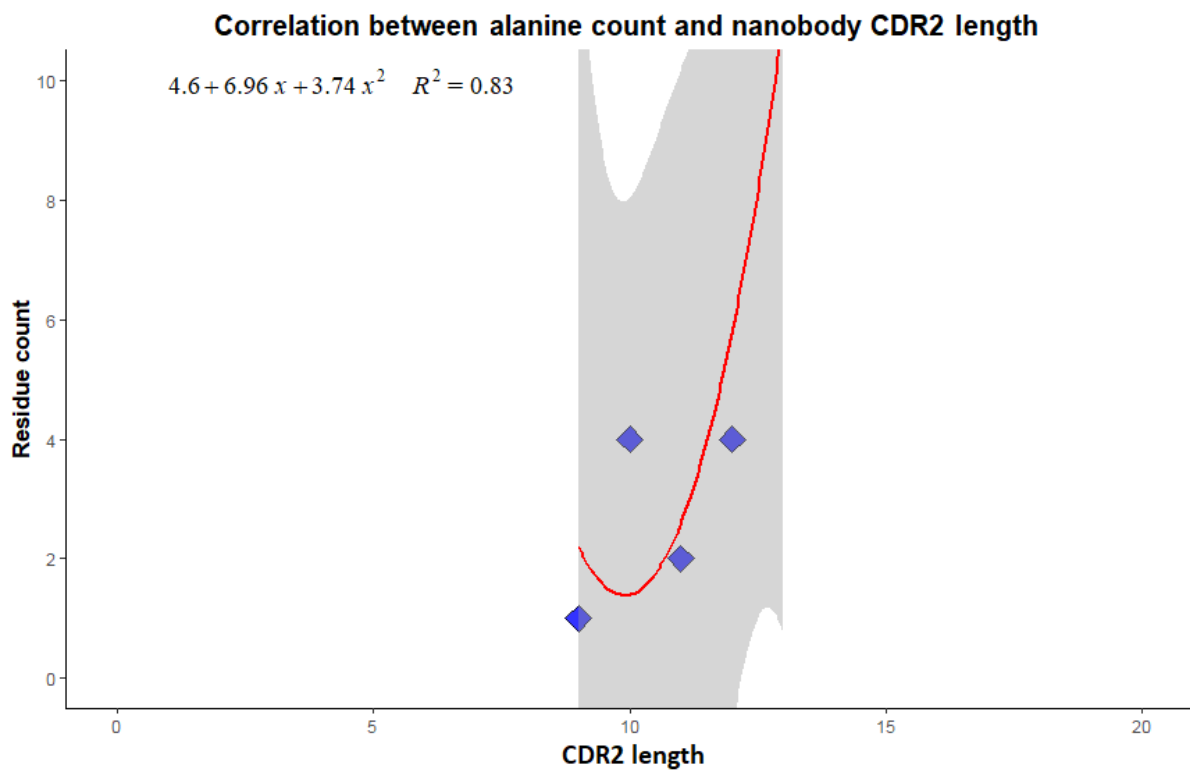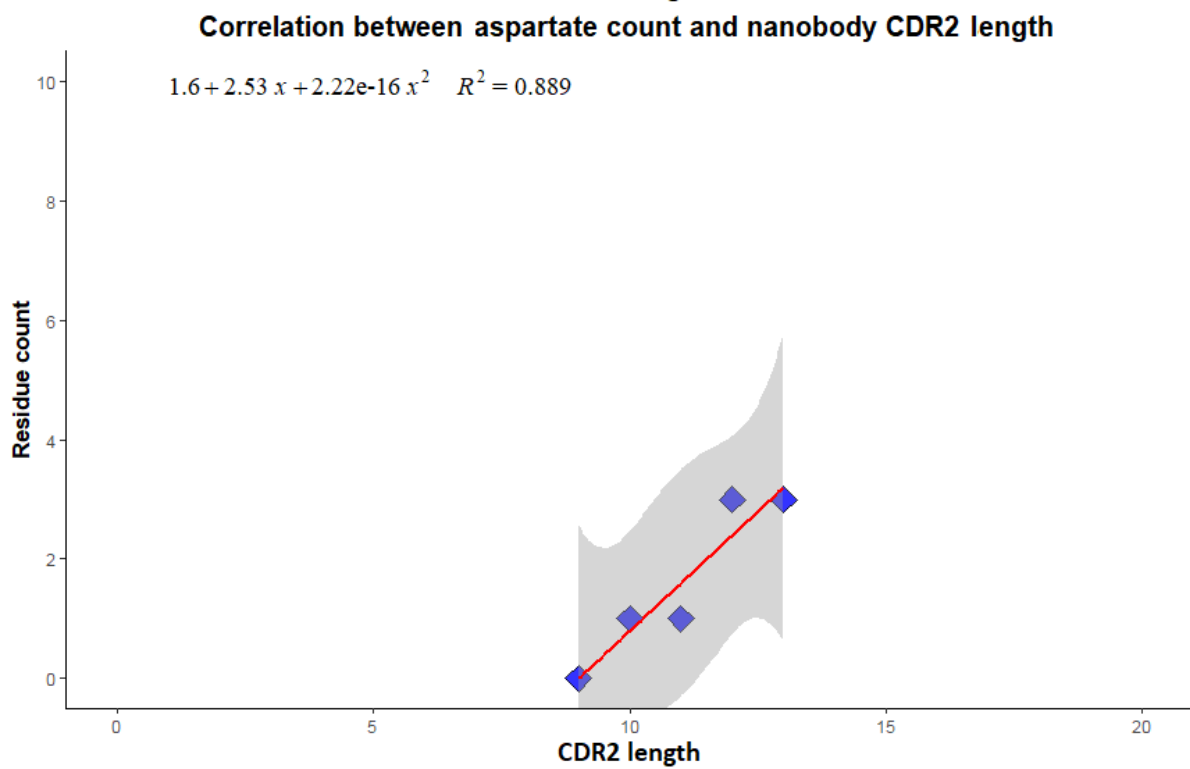

**Correlation between glutamate count and nanobody CDR2 length**

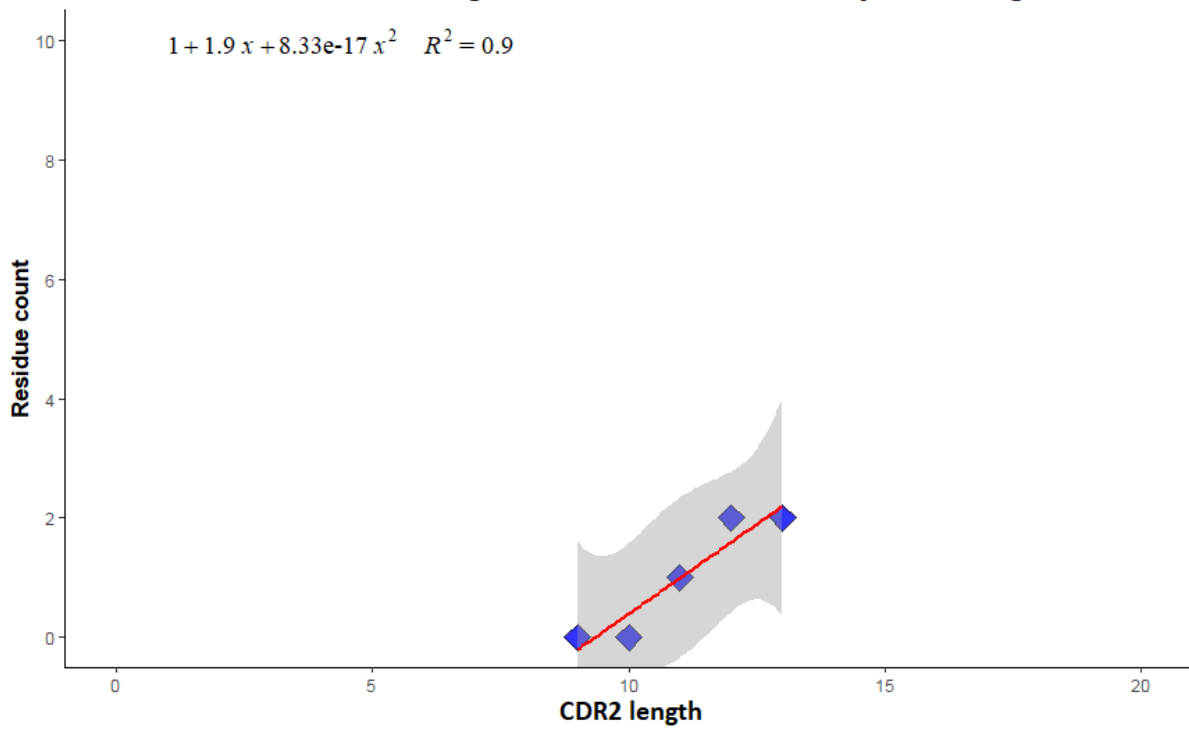

**Correlation between phenylalanine count and nanobody CDR2 length**

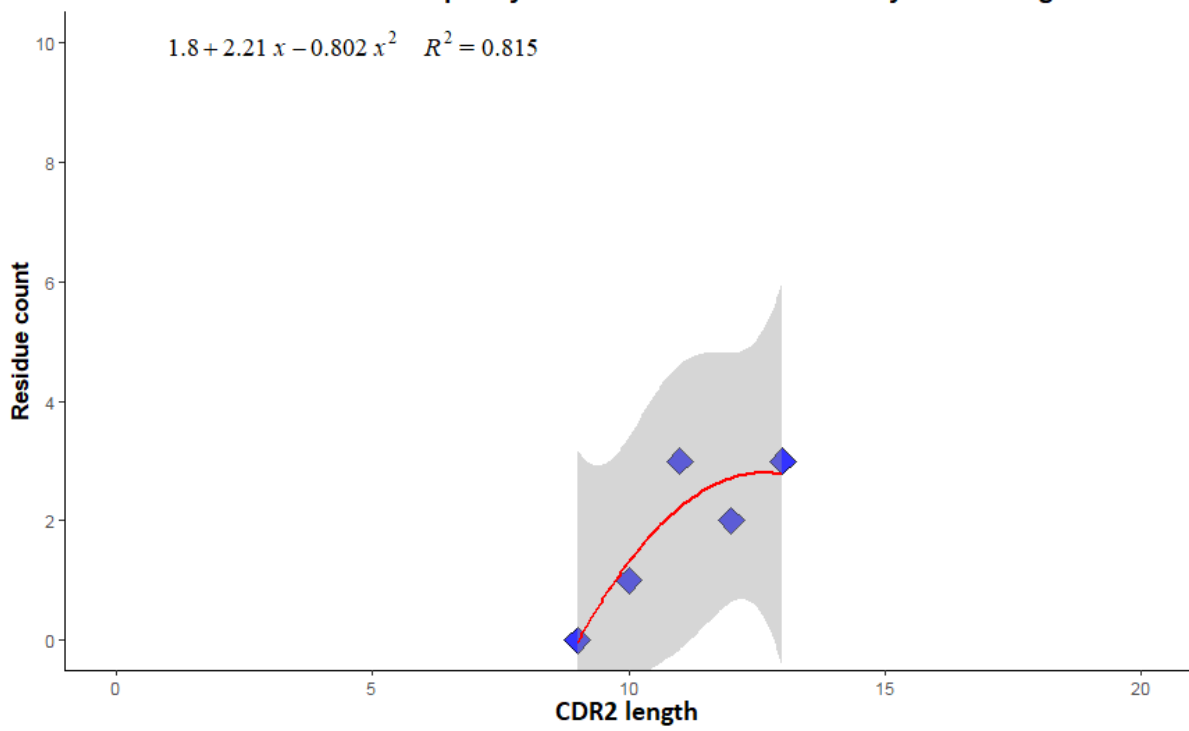

**Correlation between glycine count and nanobody CDR2 length**

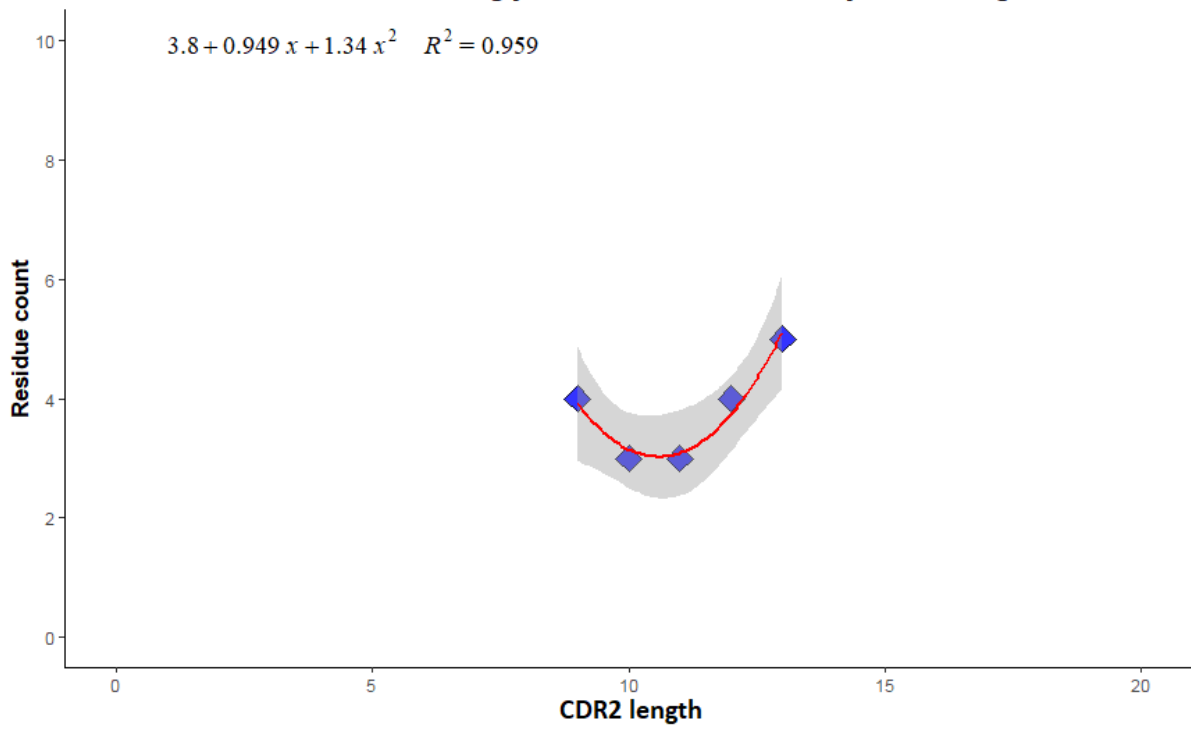

**Correlation between histidine count and nanobody CDR2 length**

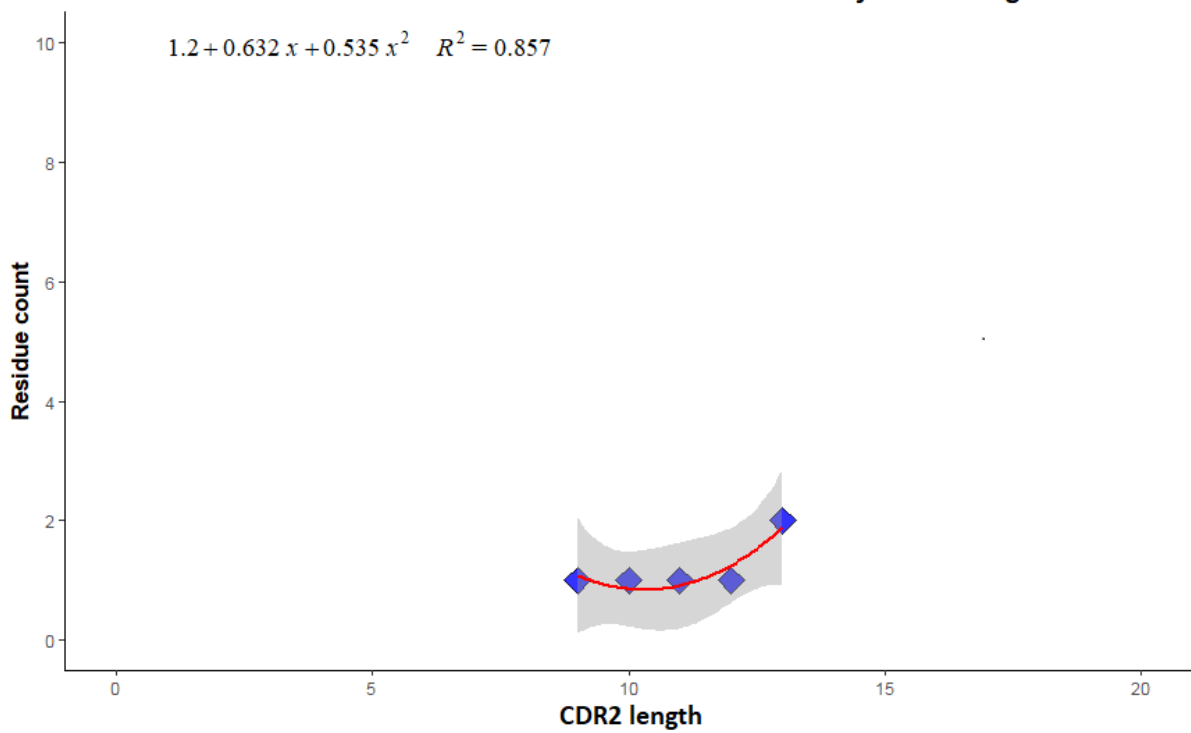

**Correlation between isoleucine count and nanobody CDR2 length**

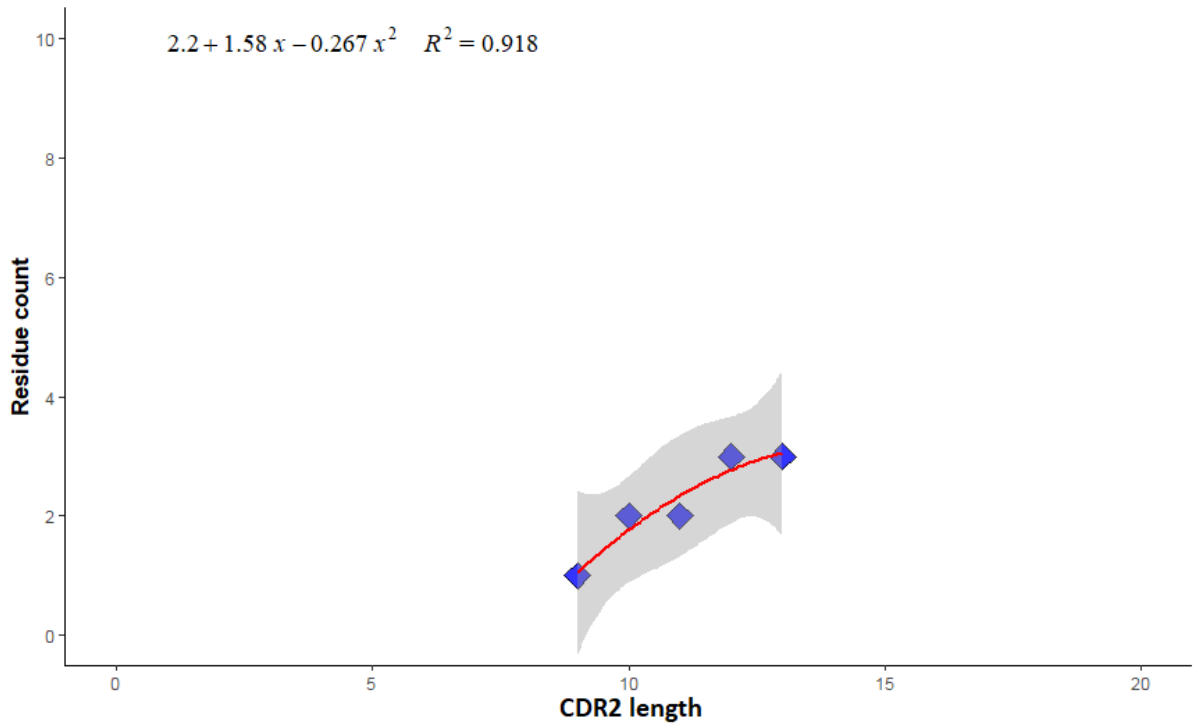

**Correlation between lysine count and nanobody CDR2 length**

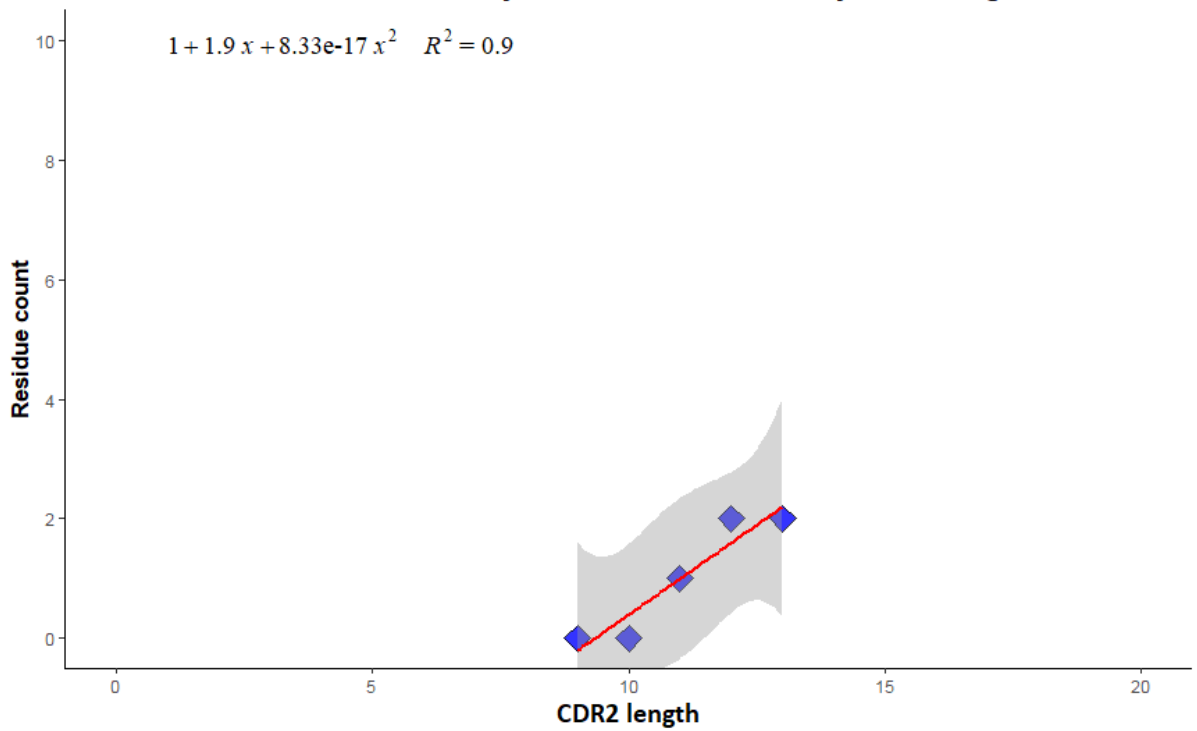

**Correlation between leucine count and nanobody CDR2 length**

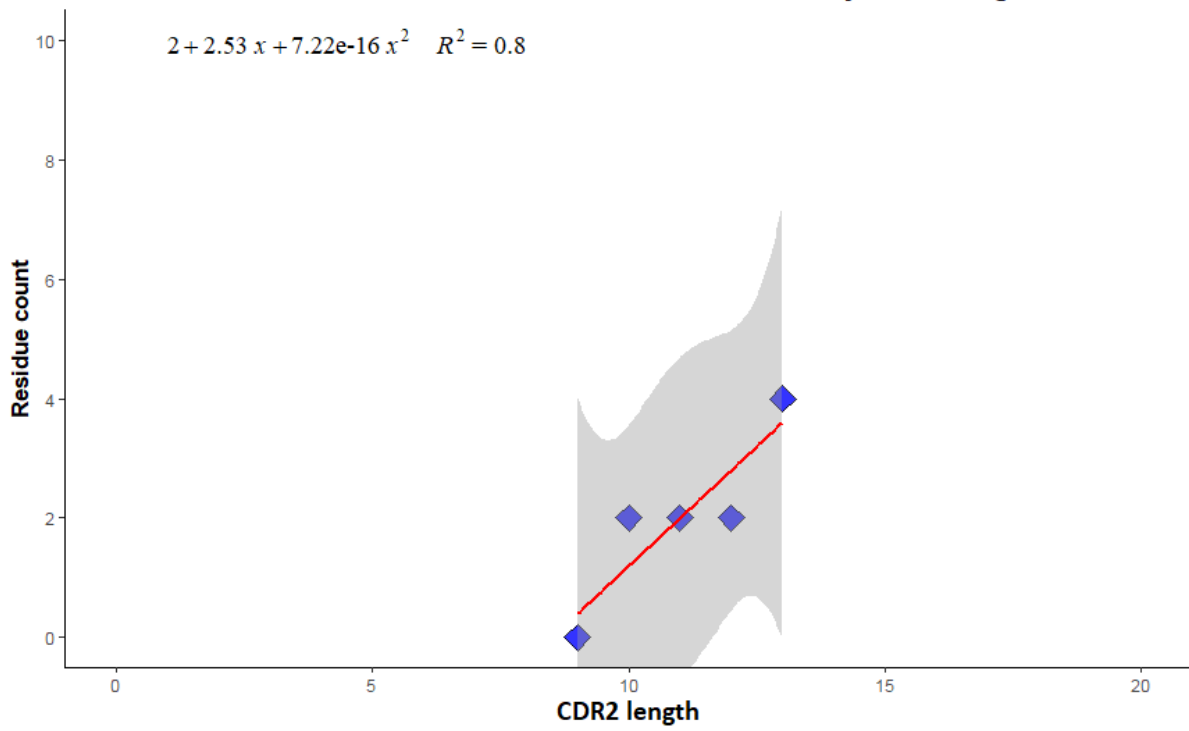

**Correlation between methionine count and nanobody CDR2 length**

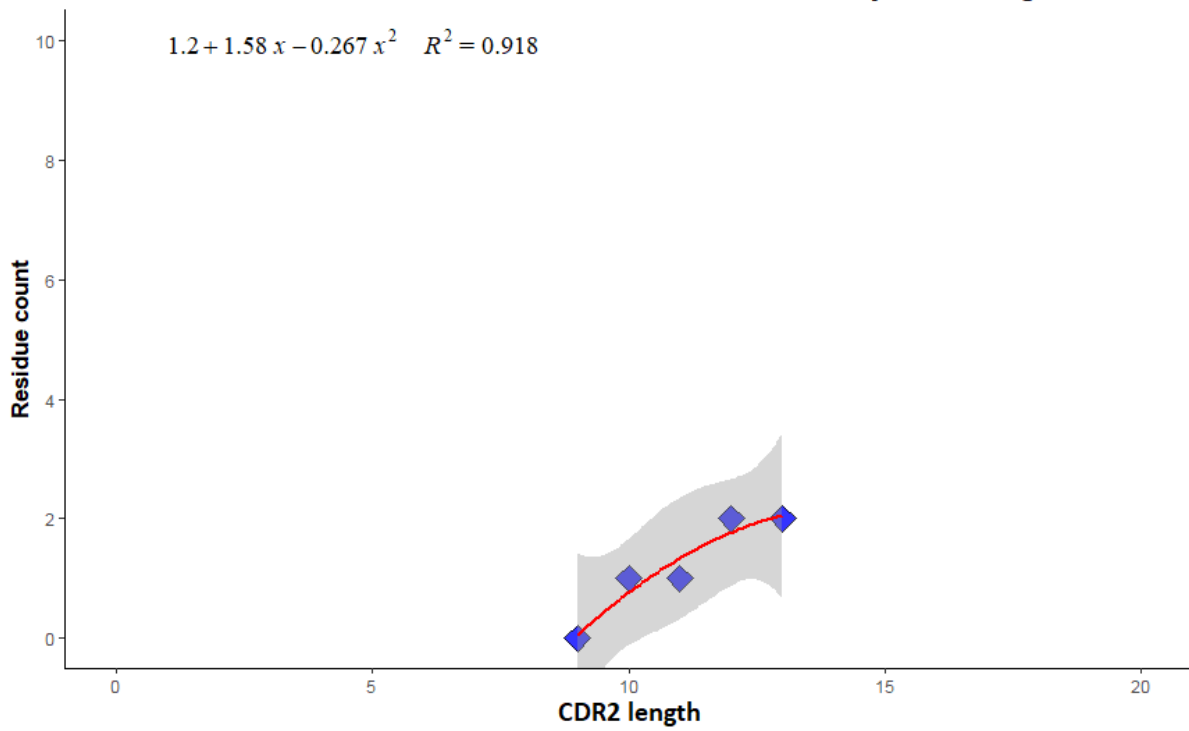

**Correlation between asparagine count and nanobody CDR2 length**

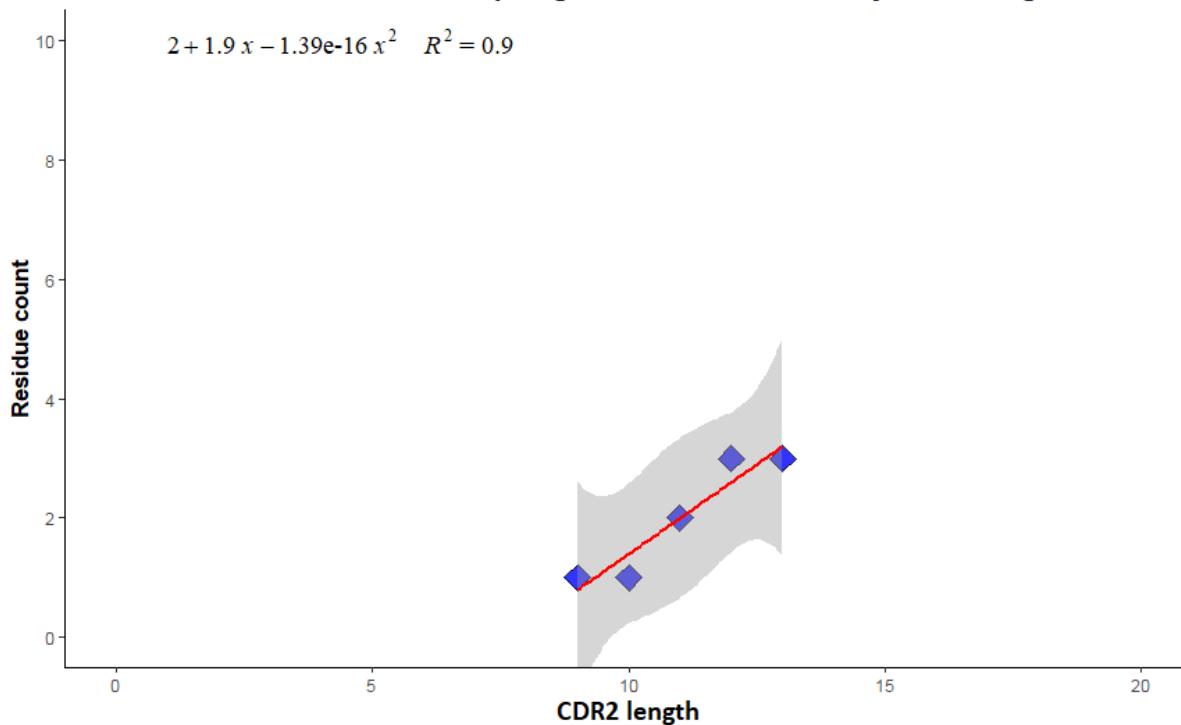

**Correlation between proline count and nanobody CDR2 length**

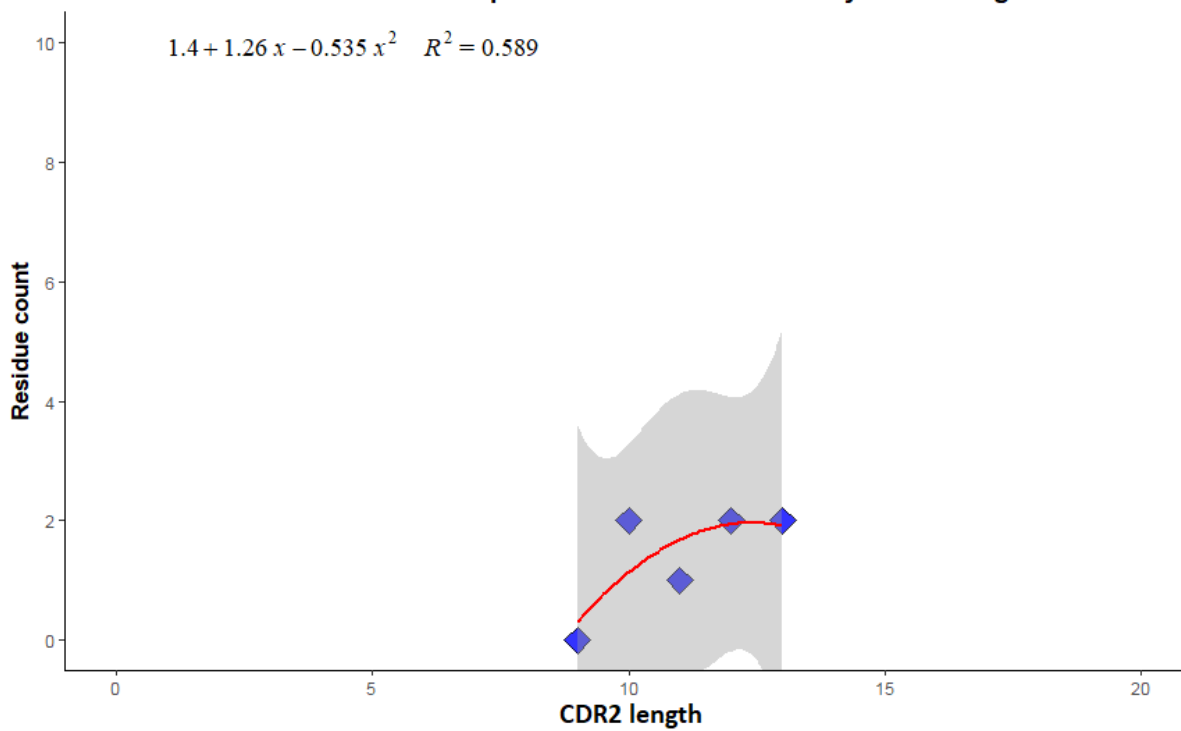

**Correlation between glutamine count and nanobody CDR2 length**

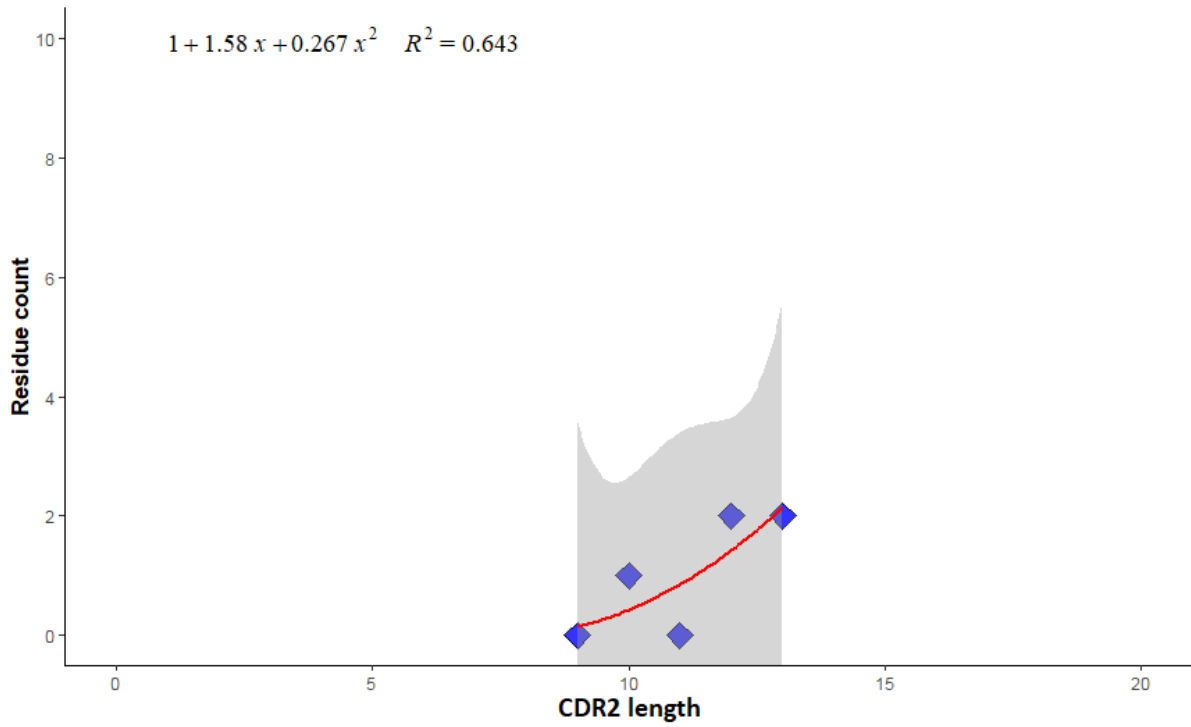

**Correlation between arginine count and nanobody CDR2 length**

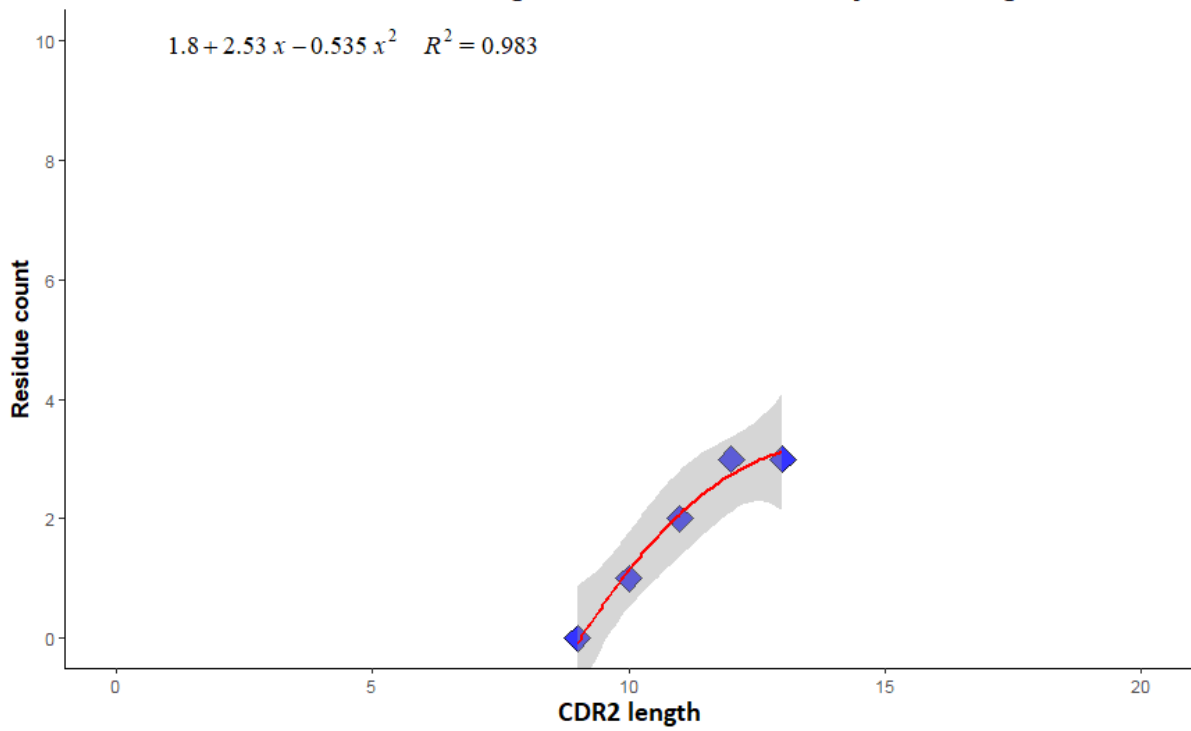

**Correlation between serine count and nanobody CDR2 length**

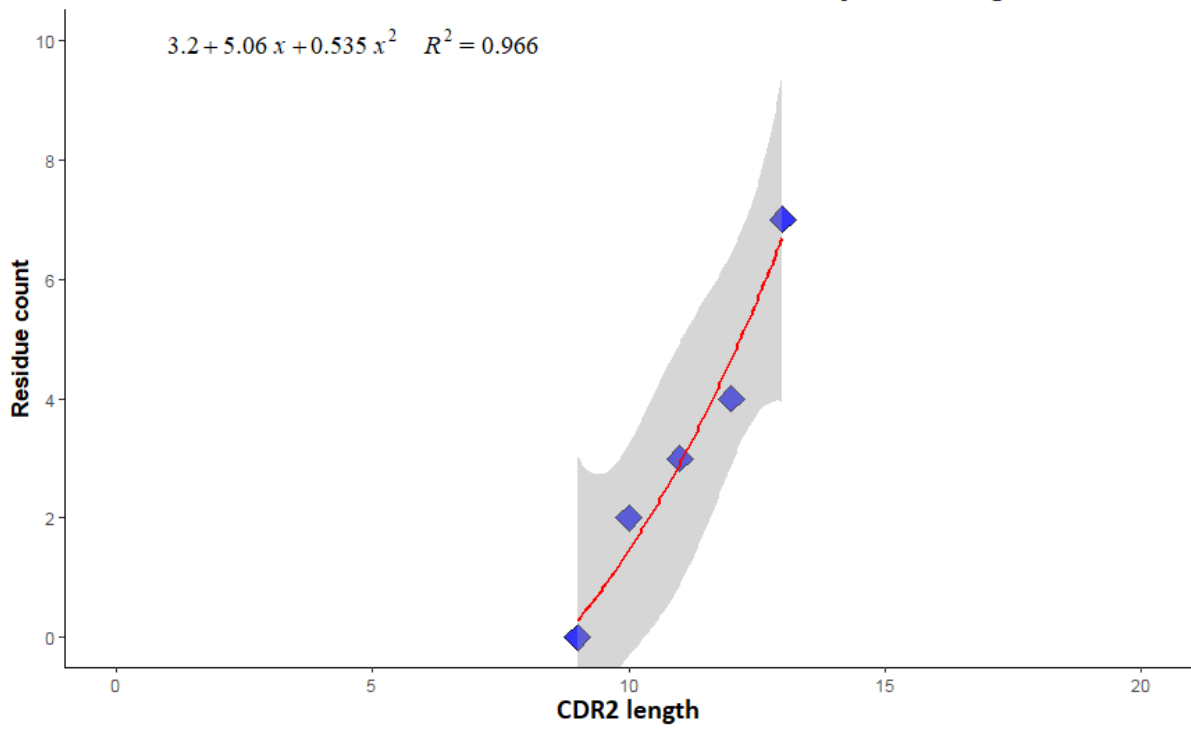

**Correlation between threonine count and nanobody CDR2 length**

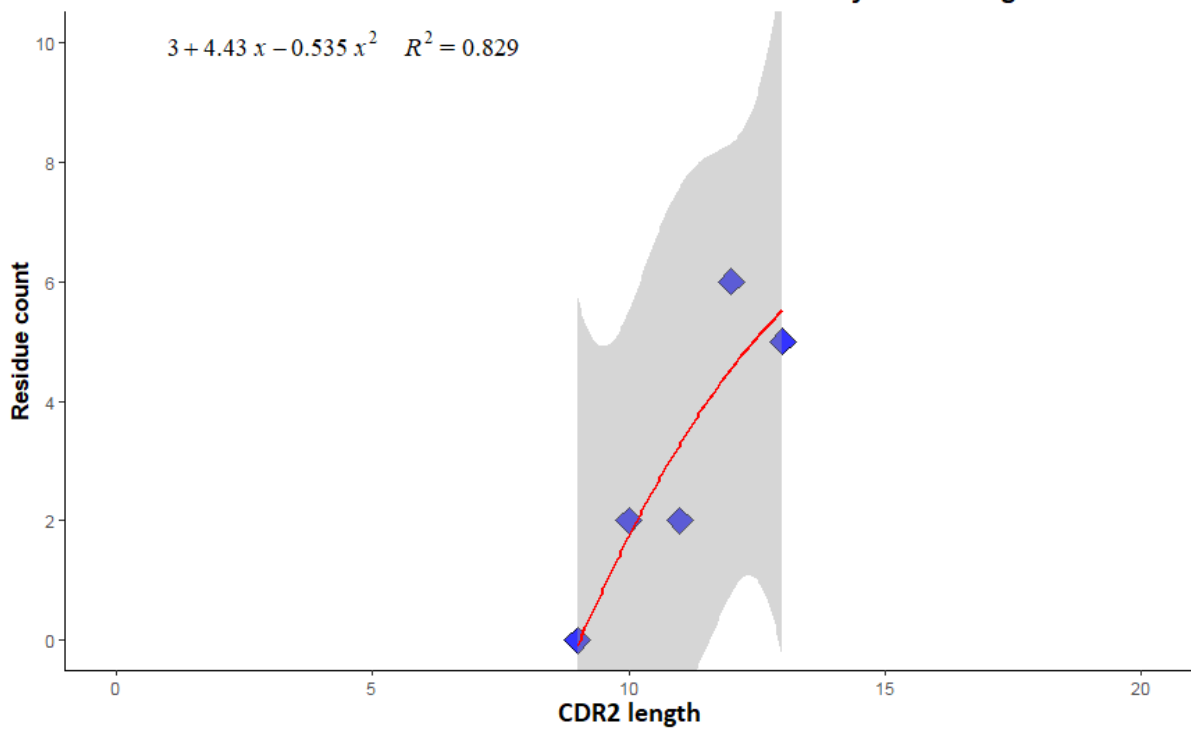



**Correlation between valine count and nanobody CDR2 length**

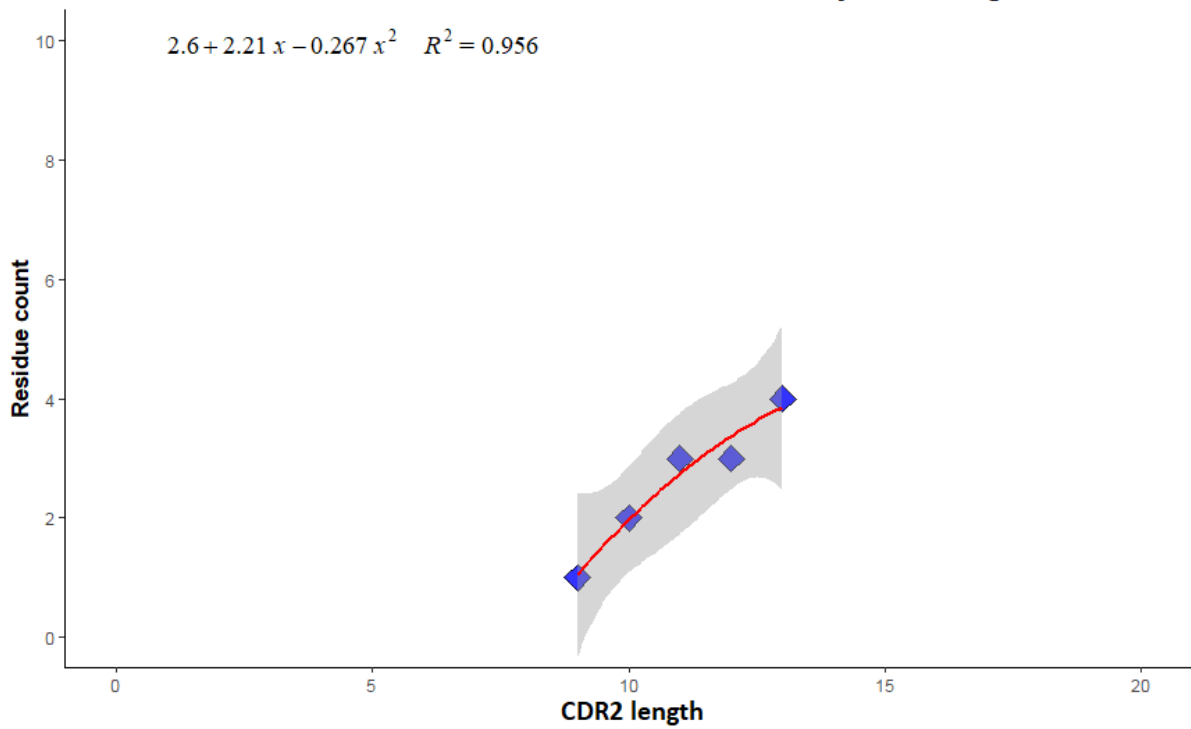

**Correlation between tryptophan count and nanobody CDR2 length**

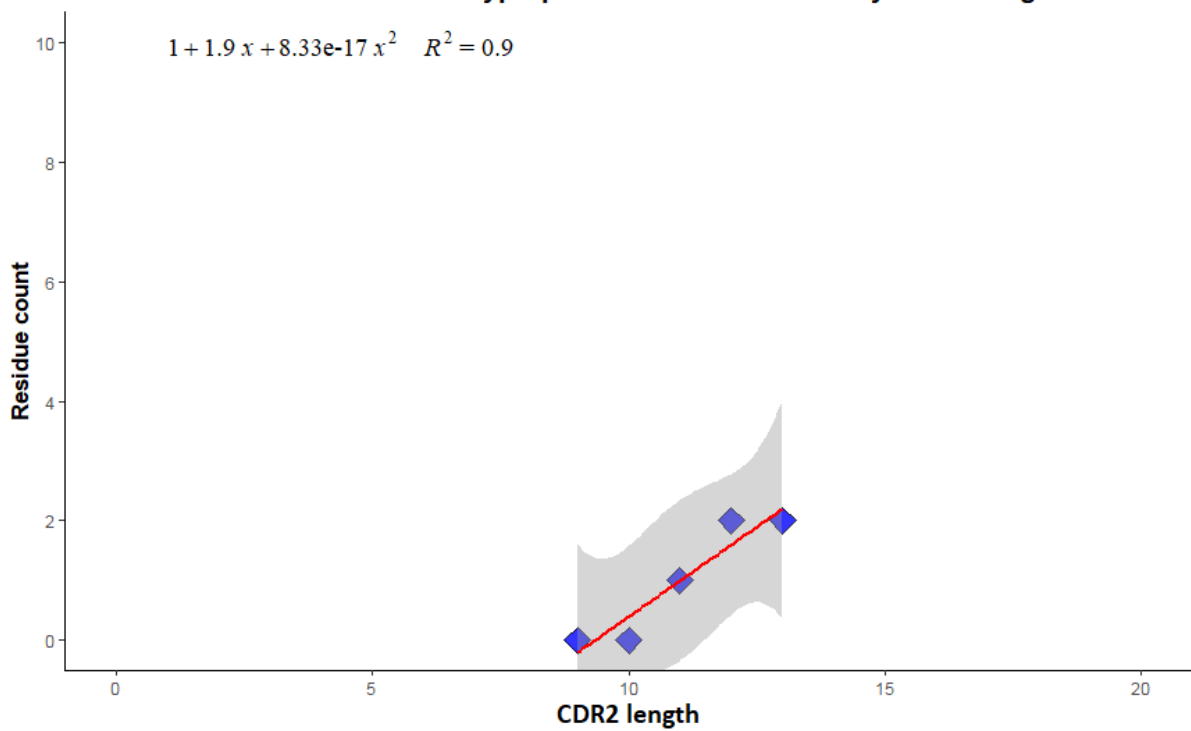

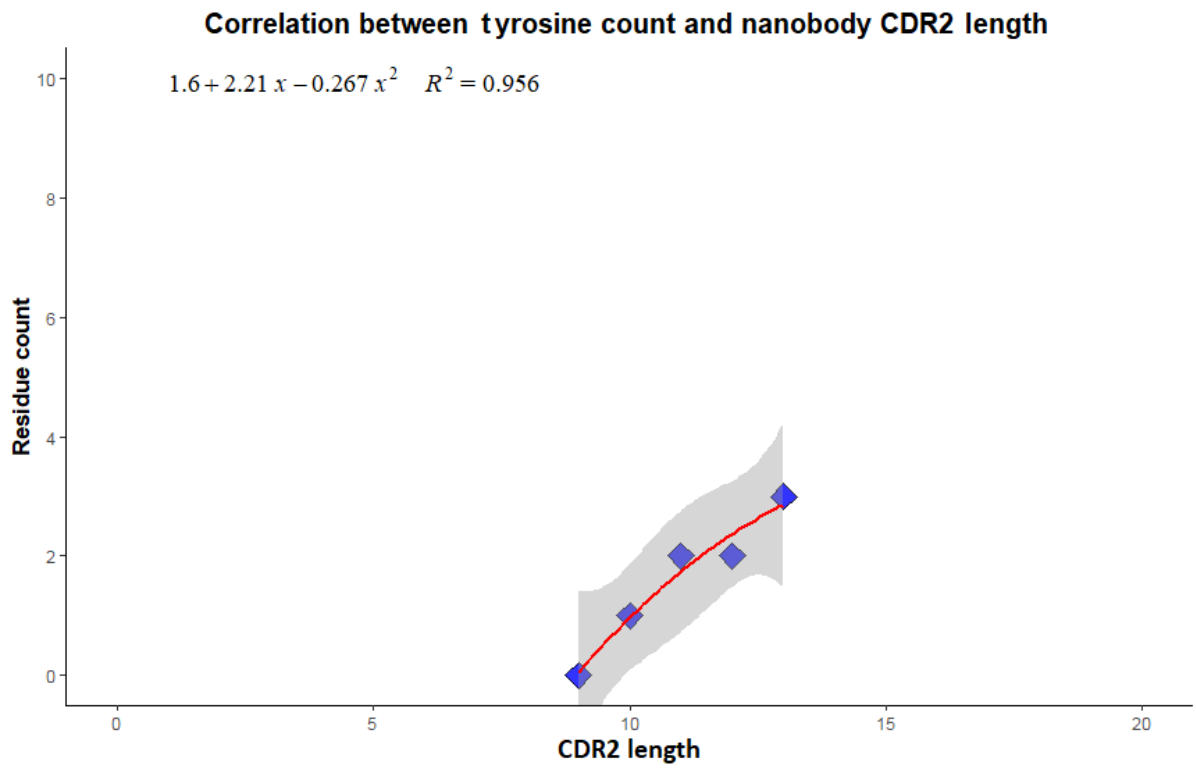

Supplement Figure 1. Correlation between the highest occurrence of amino acids and CDR2 lengths.

## Supplement Figure 2

### Correlation between alanine count and nanobody CDR3 length

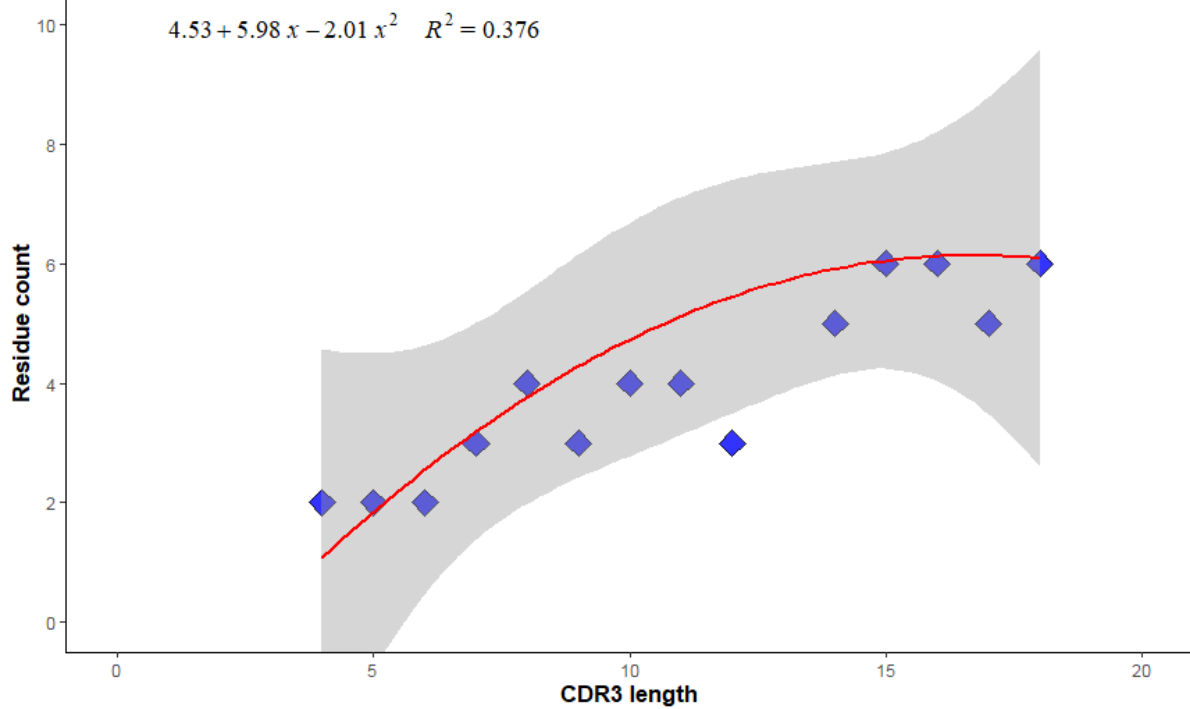

### Correlation between aspartate count and nanobody CDR3 length

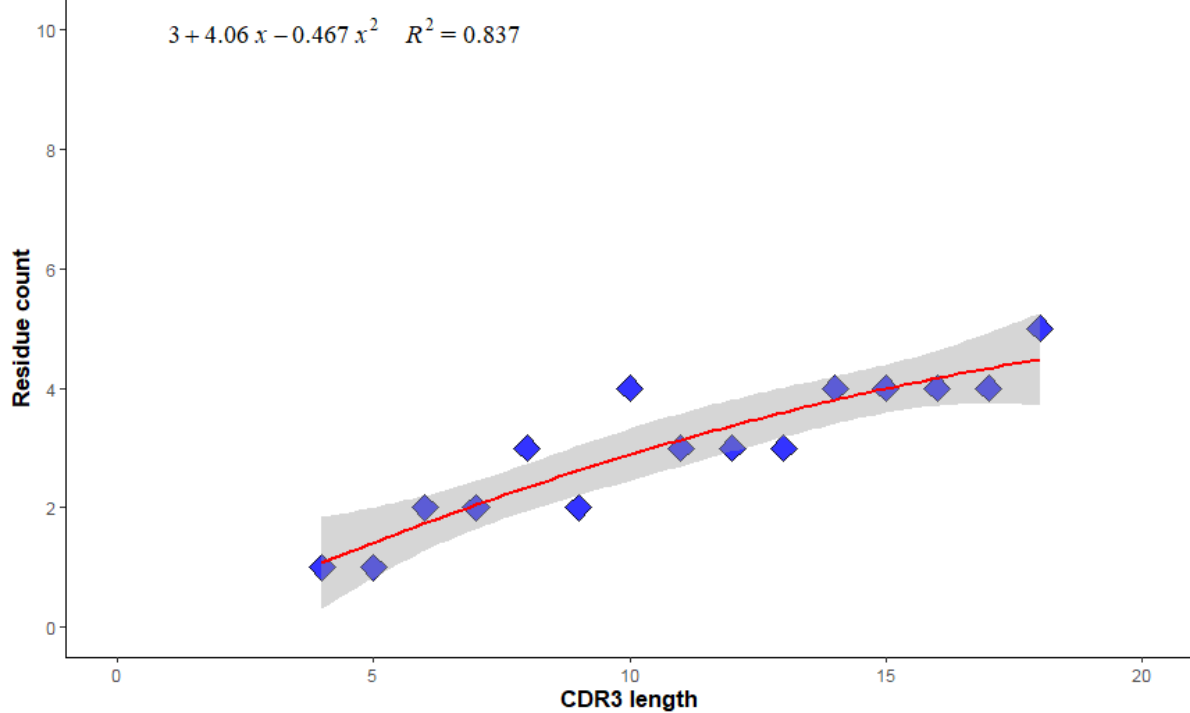

### Correlation between glutamate count and nanobody CDR3 length

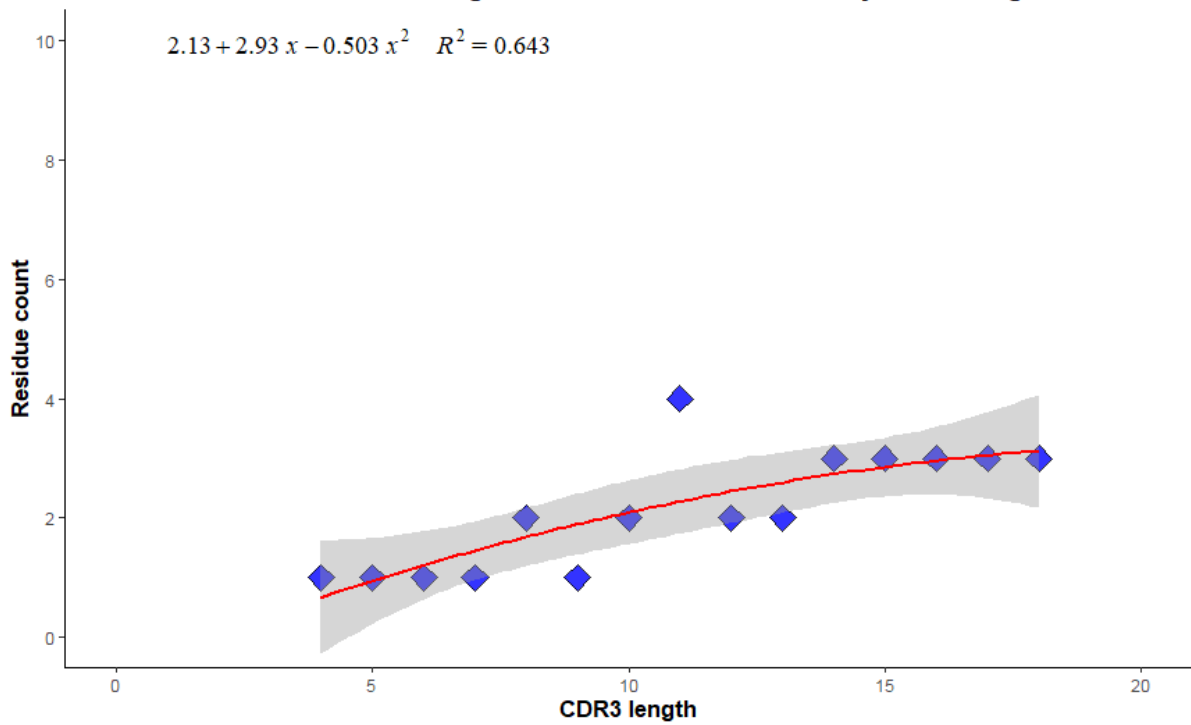

### Correlation between phenylalanine count and nanobody CDR3 length

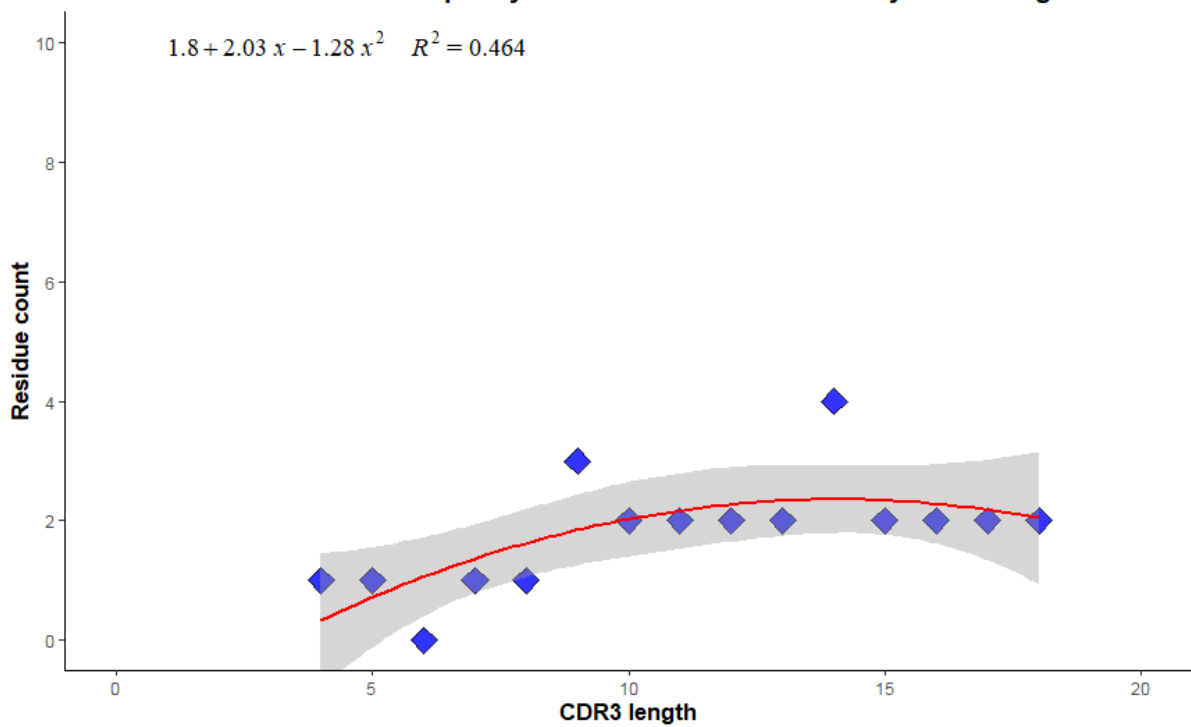

### Correlation between glutamine count and nanobody CDR3 length

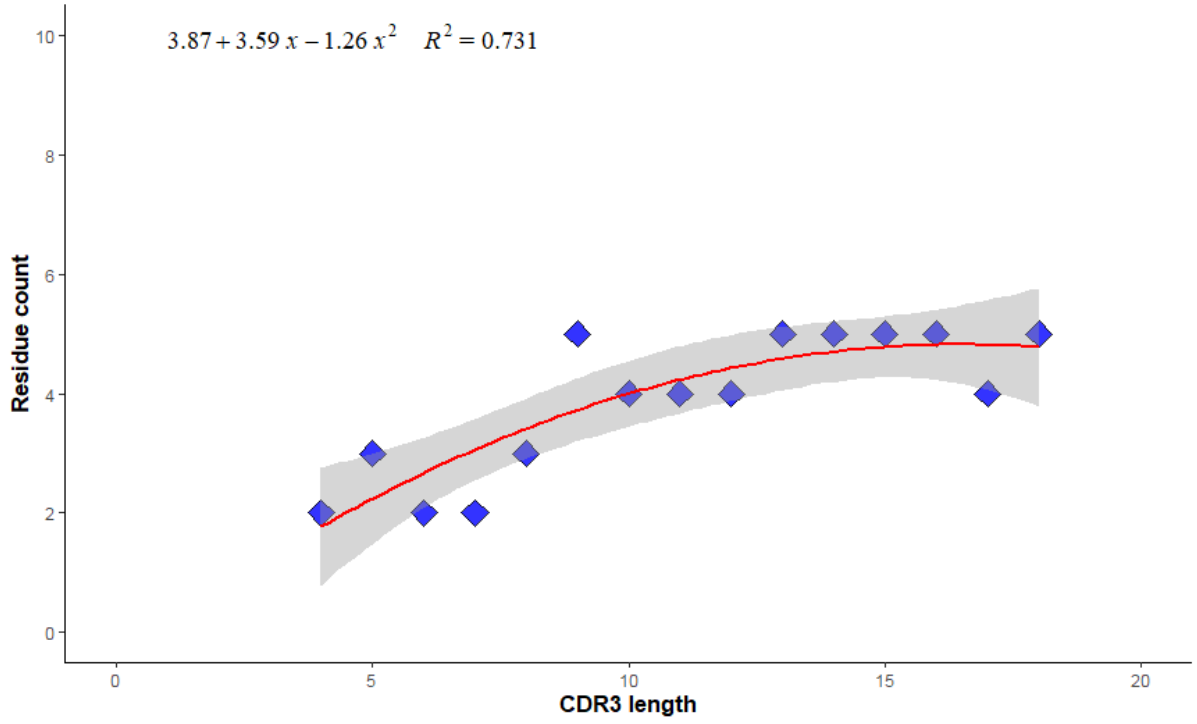

### Correlation between histidine count and nanobody CDR3 length

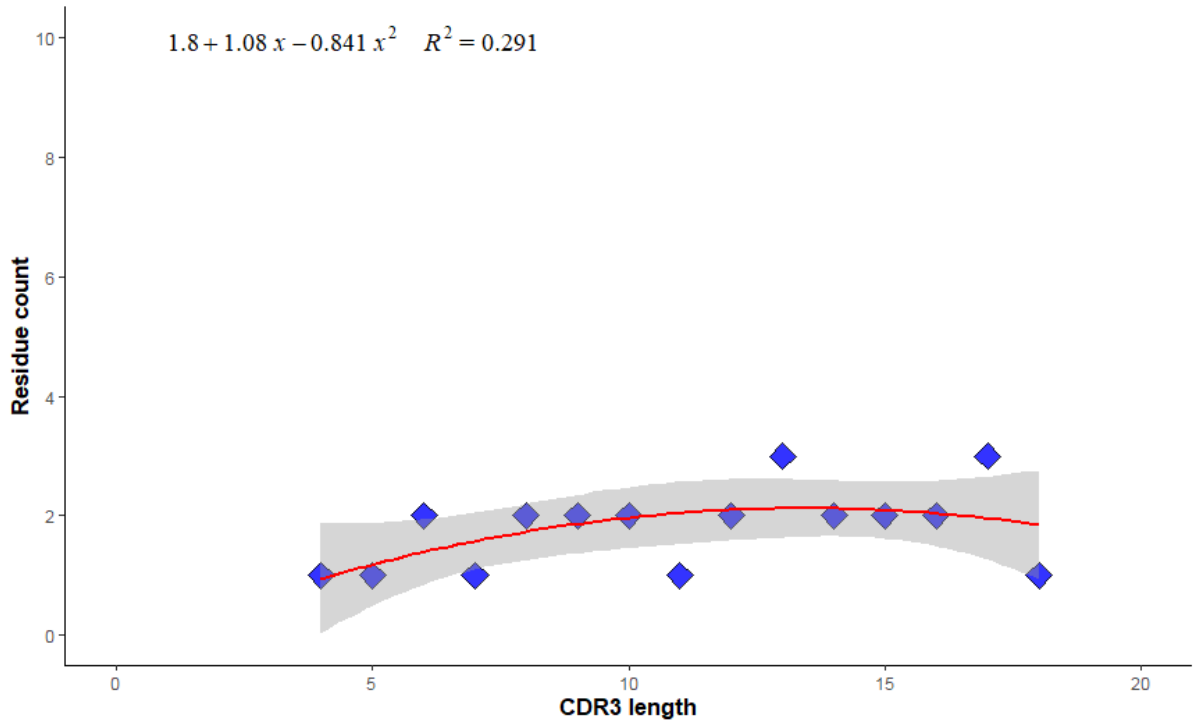

### Correlation between isoleucine count and nanobody CDR3 length

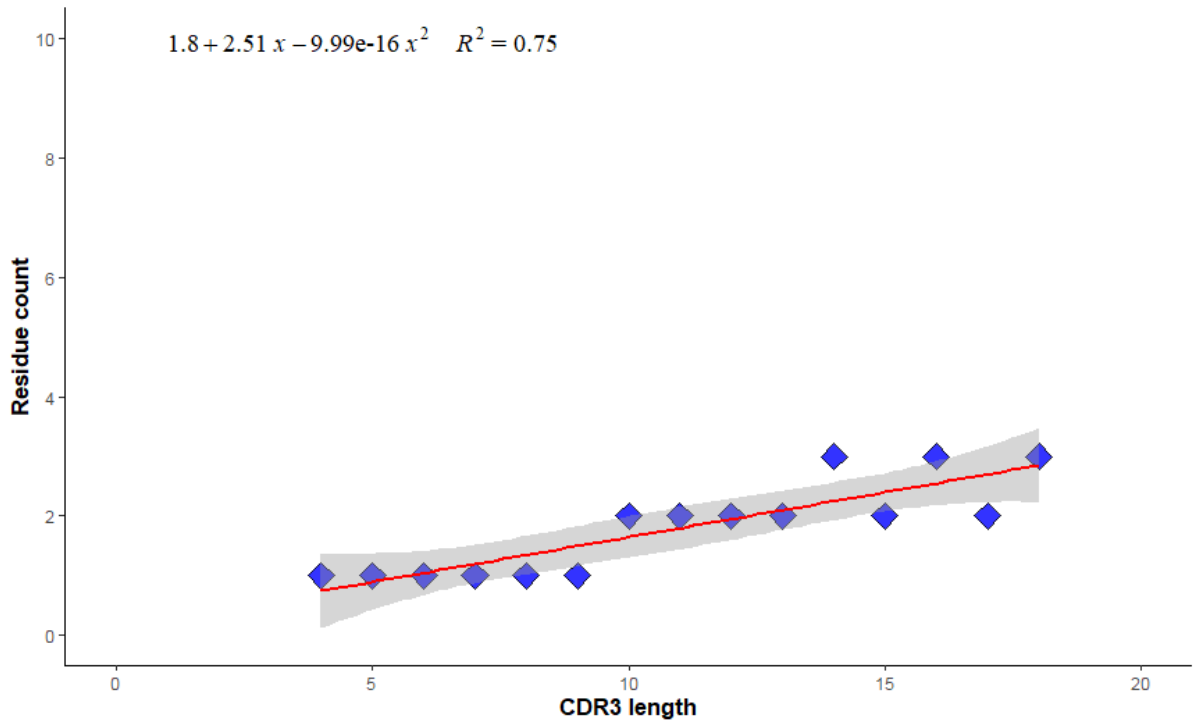

### Correlation between lysine count and nanobody CDR3 length

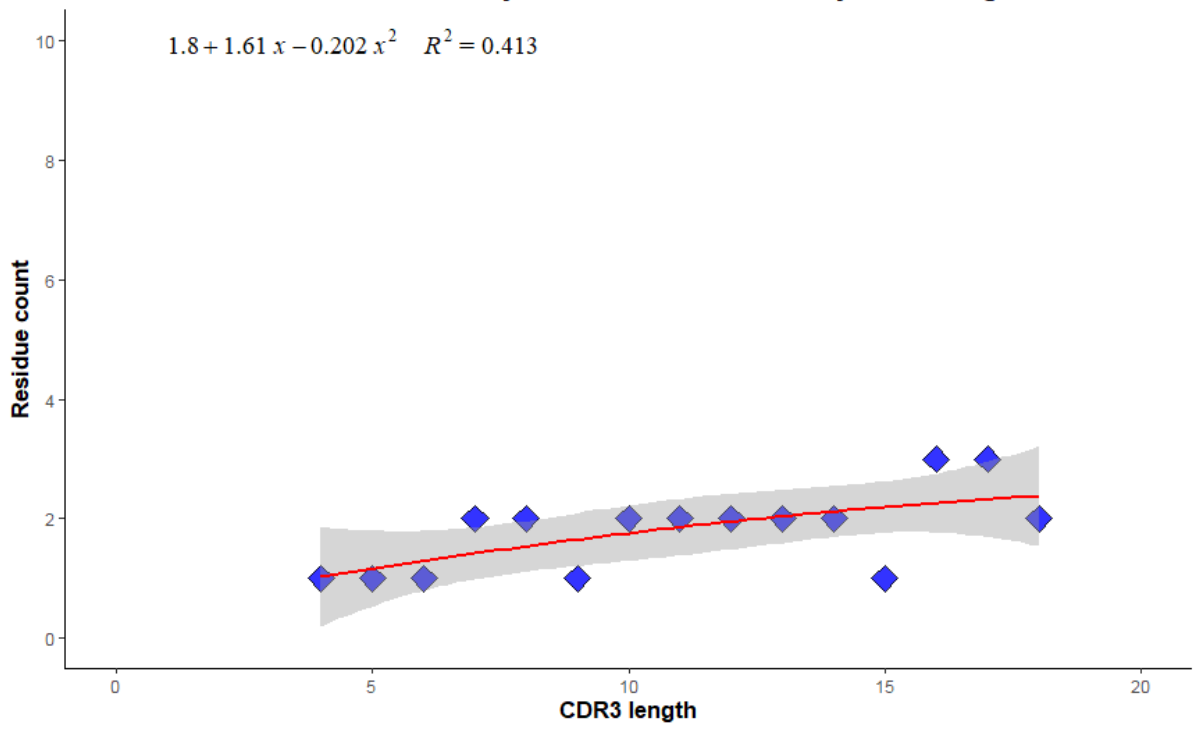

### Correlation between leucine count and nanobody CDR3 length

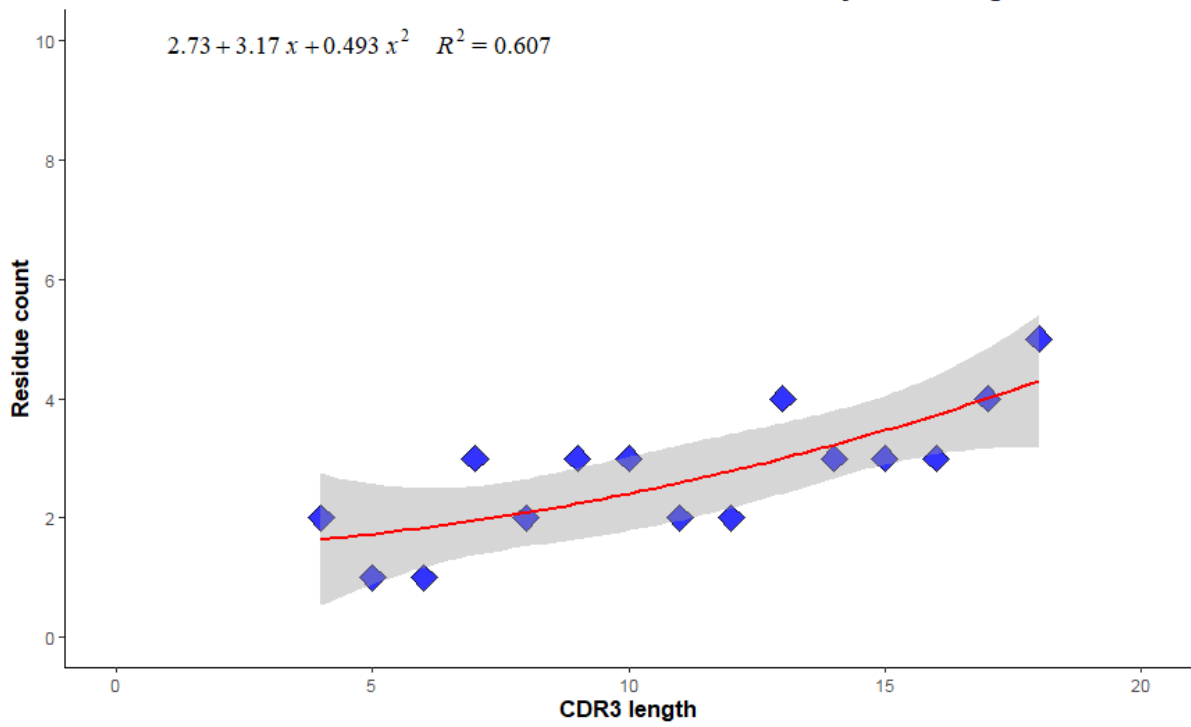

### Correlation between methionine count and nanobody CDR3 length

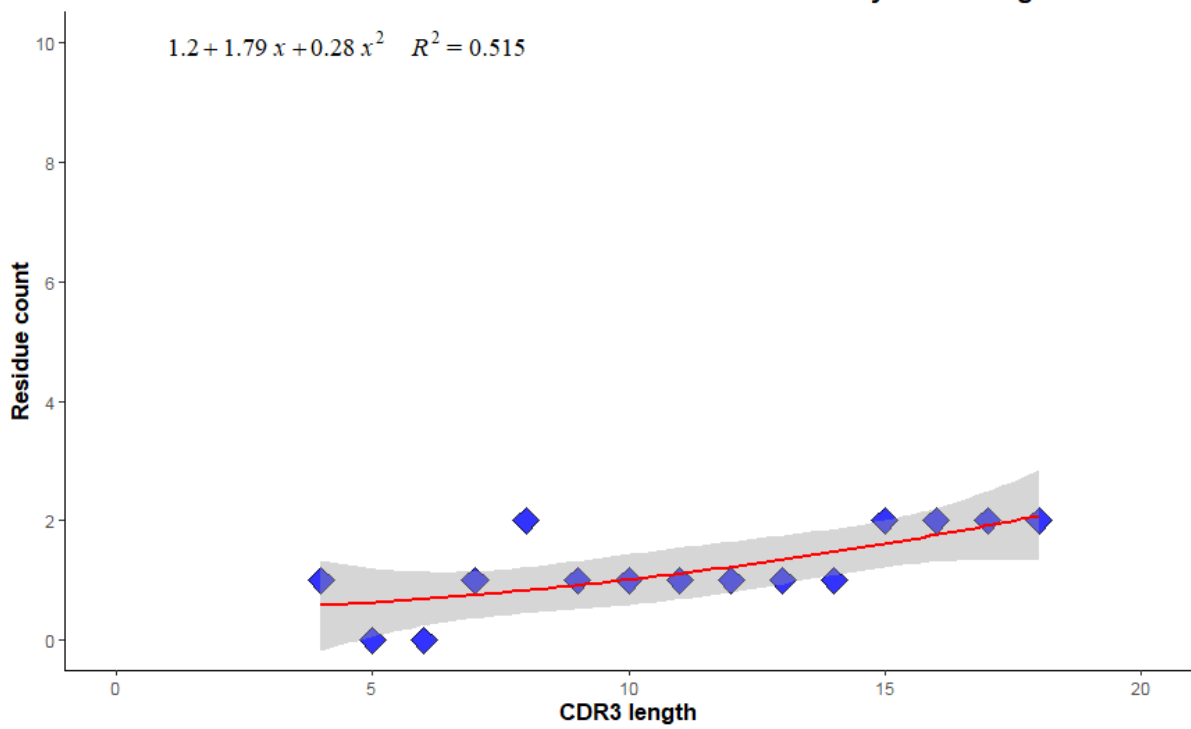

**Correlation between asparagine count and nanobody CDR3 length**

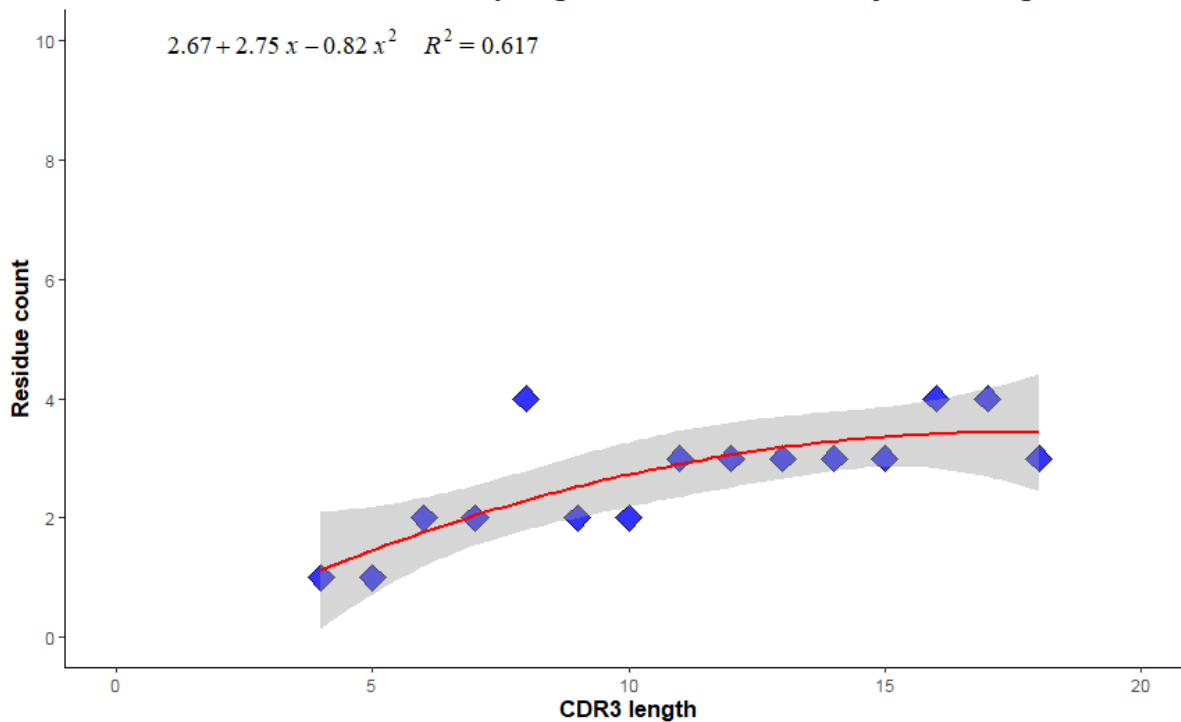

**Correlation between proline count and nanobody CDR3 length**

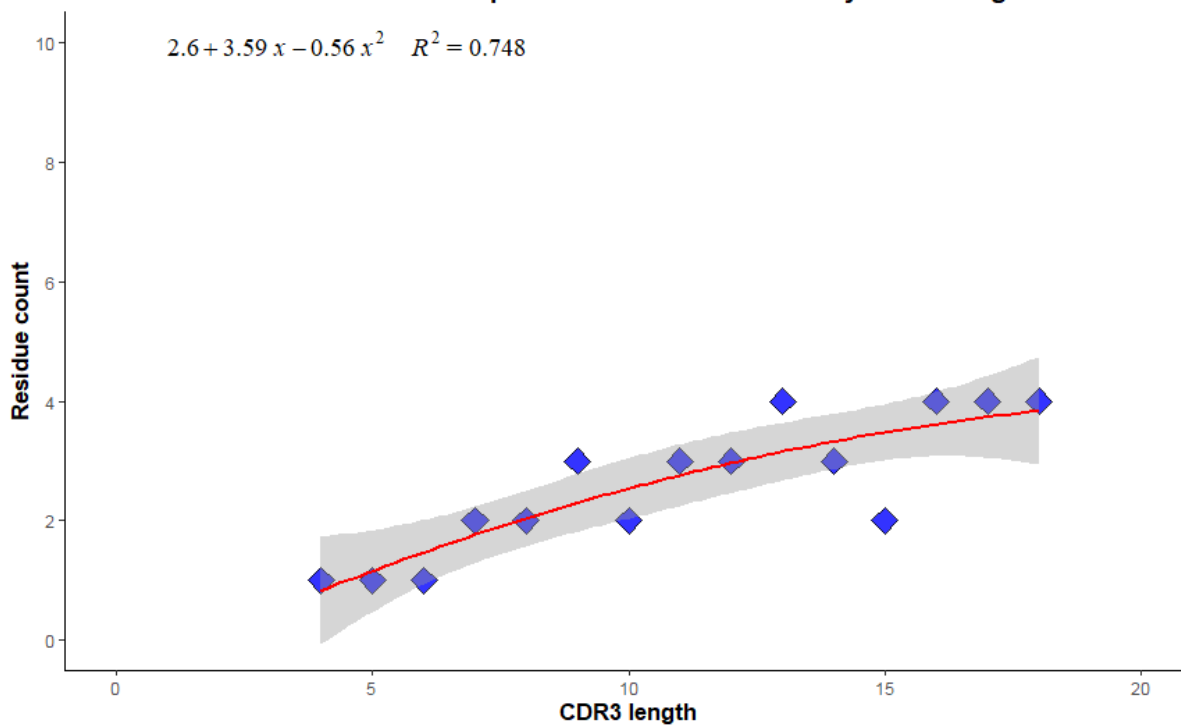



### Correlation between glutamine count and nanobody CDR3 length

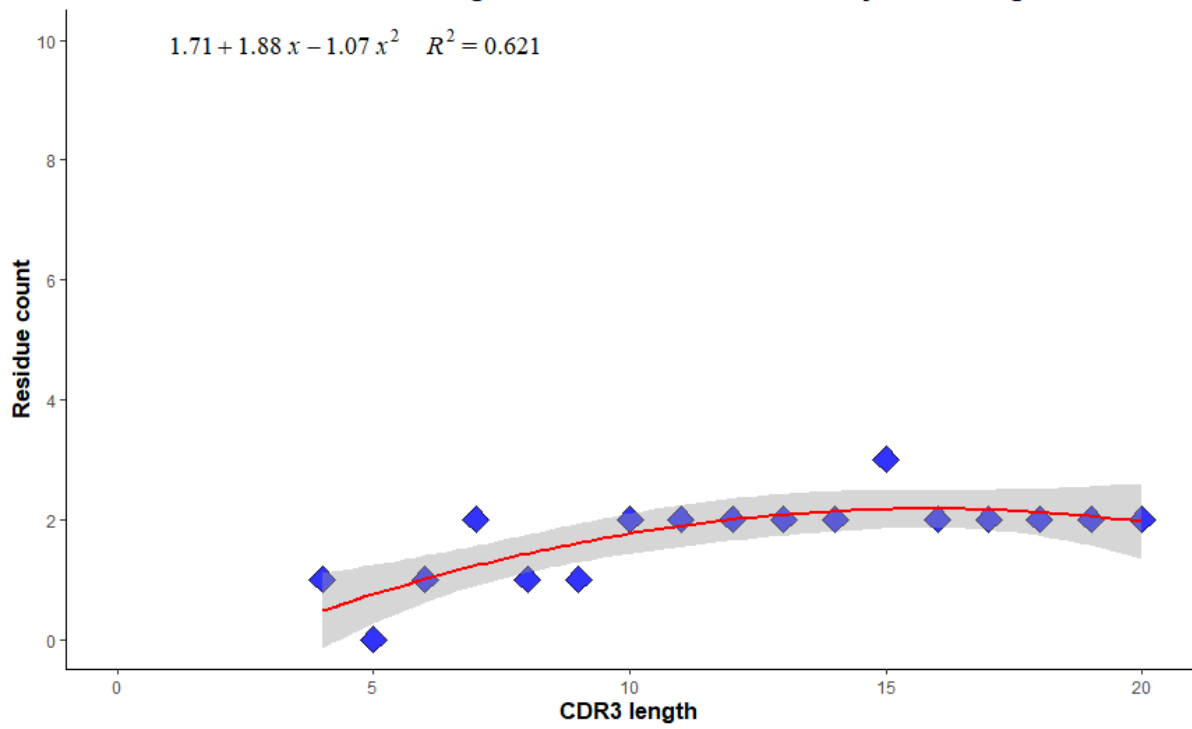

### Correlation between arginine count and nanobody CDR3 length

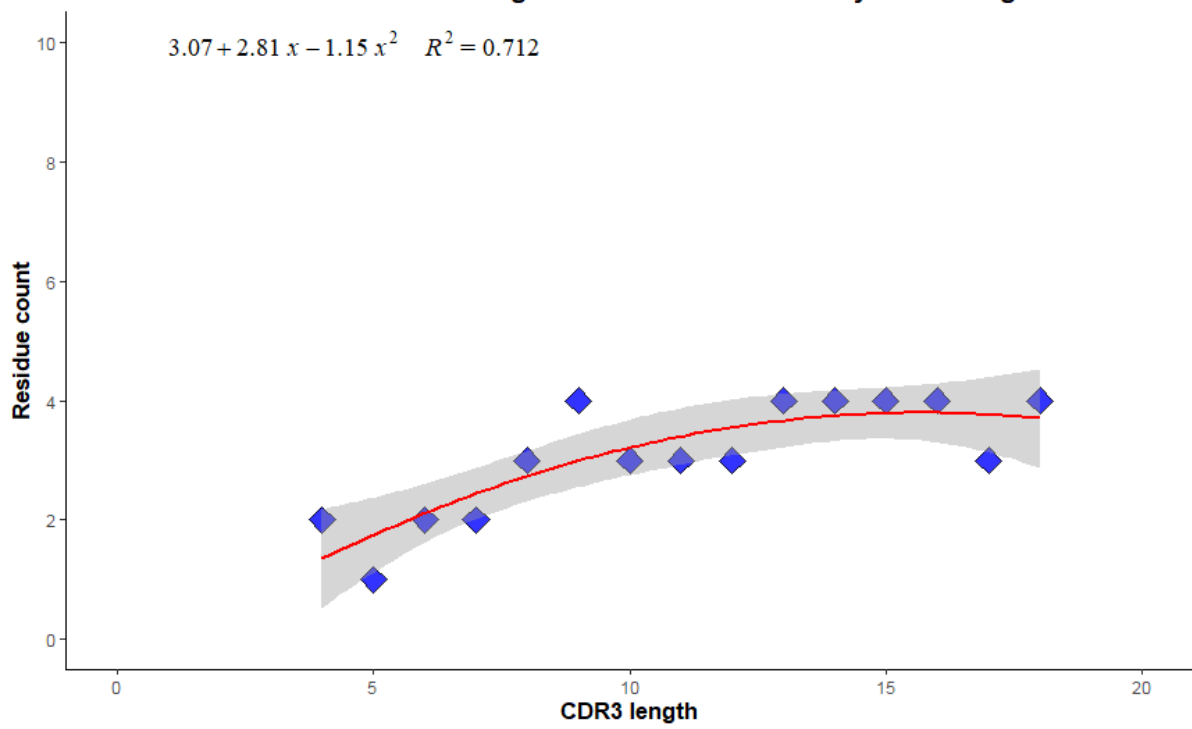

**Correlation between serine count and nanobody CDR3 length**

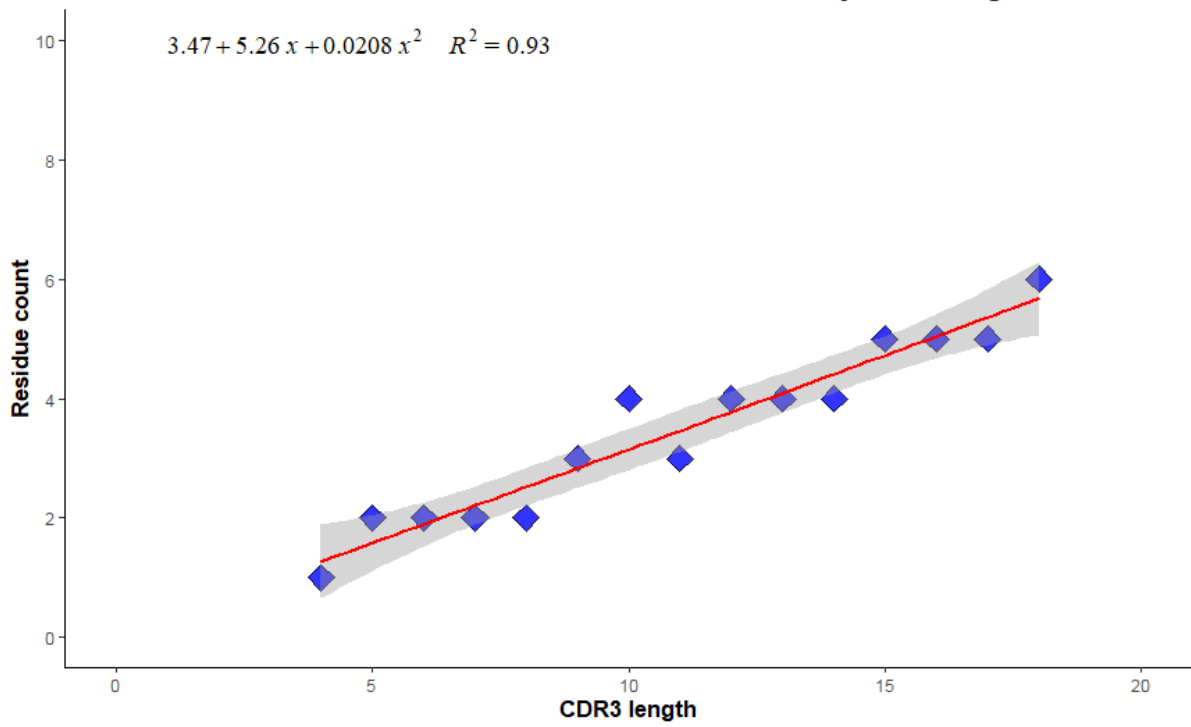

**Correlation between threonine count and nanobody CDR3 length**

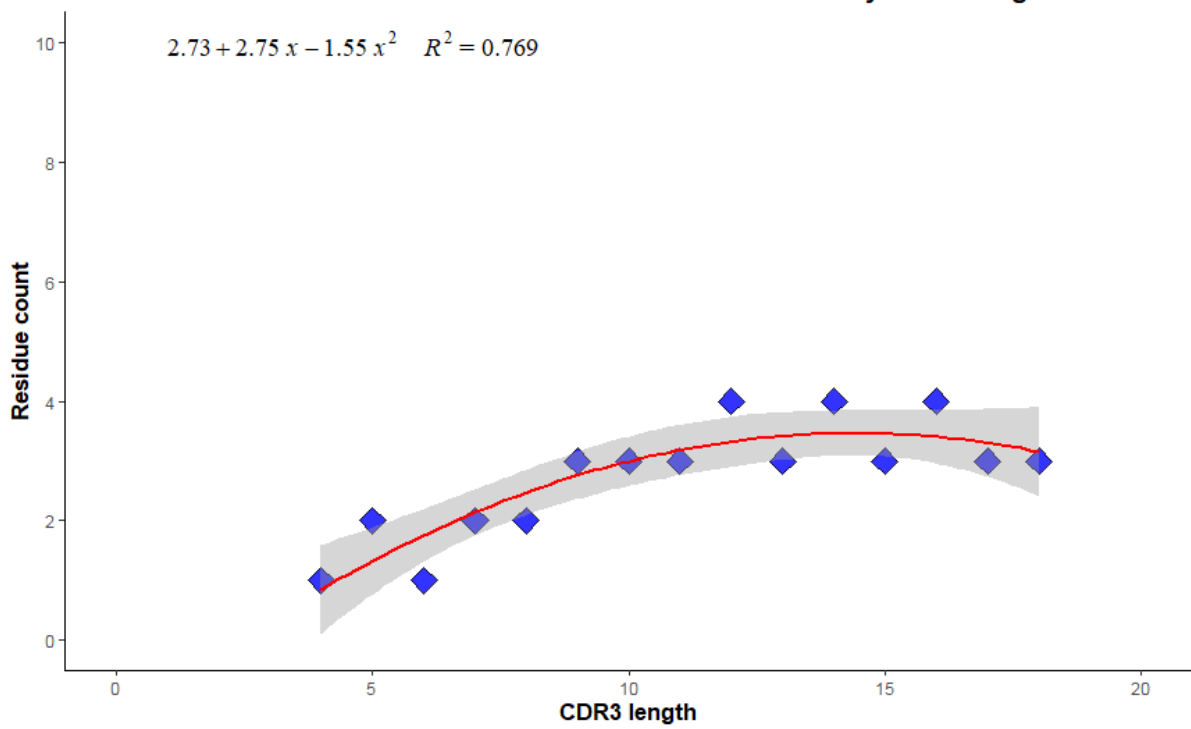

**Correlation between valine count and nanobody CDR3 length**

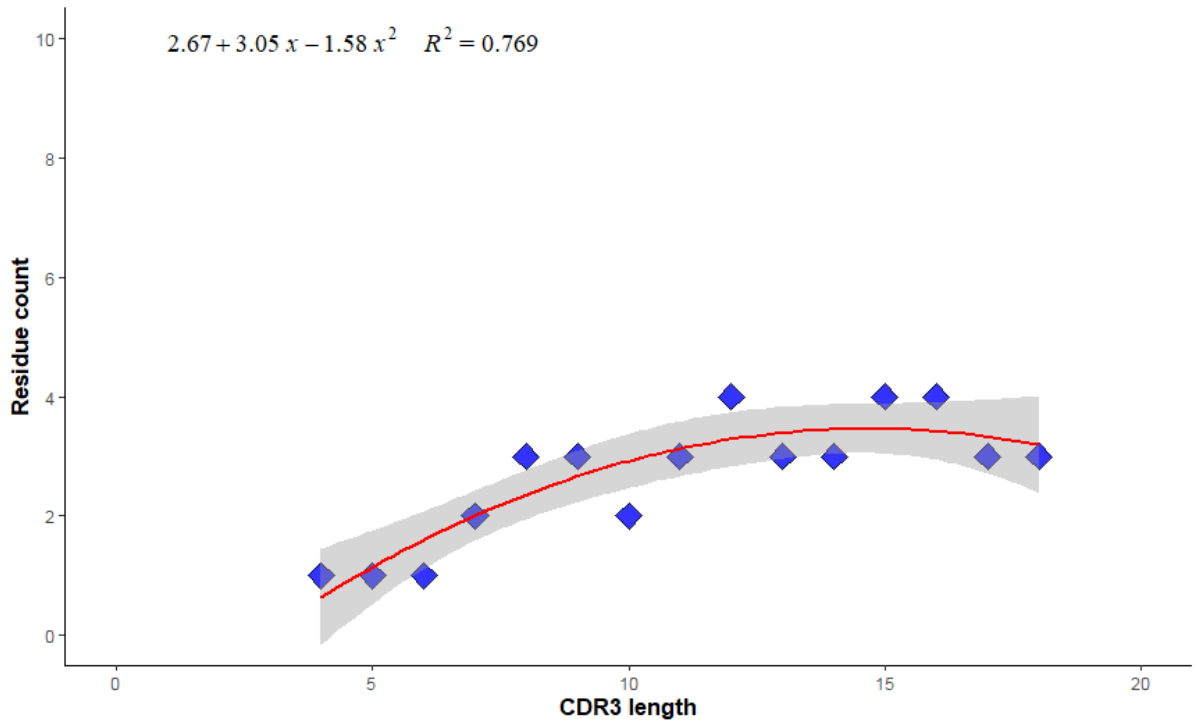

**Correlation between tryptophan count and nanobody CDR3 length**

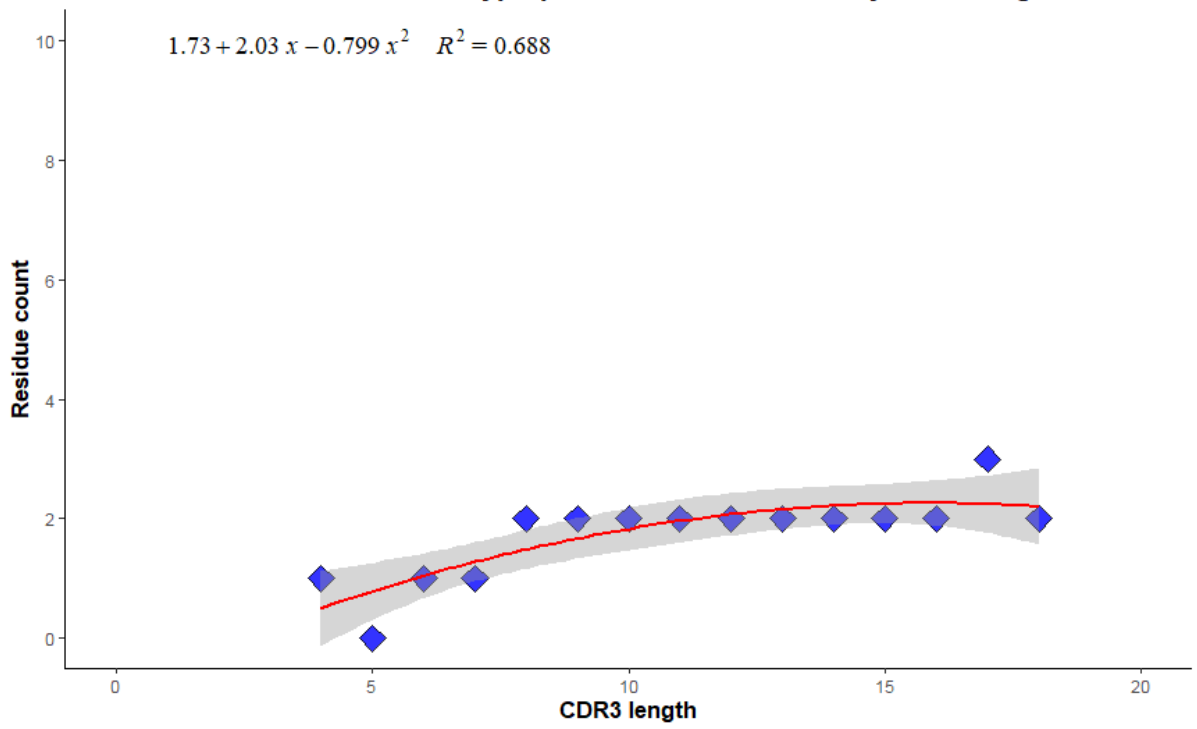

Supplement: 43141_2022_439_MOESM1_ESM.pdf [file 43141_2022_439_MOESM1_ESM.pdf]
